# Supplementary material
Source: publisher site journal article supplement (http://www.spandidos-publications.com/979/downloadSupplementary)

Figure S1. Effect of BEA and CEA treatment on Rip3 protein expression levels. Western blots for (A) BEA and (B) CEA treatment. Quantification of protein band density for (C) BEA and (D) CEA treatment, which did not significantly alter the protein expression levels of Rip3.  $\beta$ -actin was used as the internal loading control protein. BEA, *Bridelia ovata*; CEA, *Croton oblongifolius*.

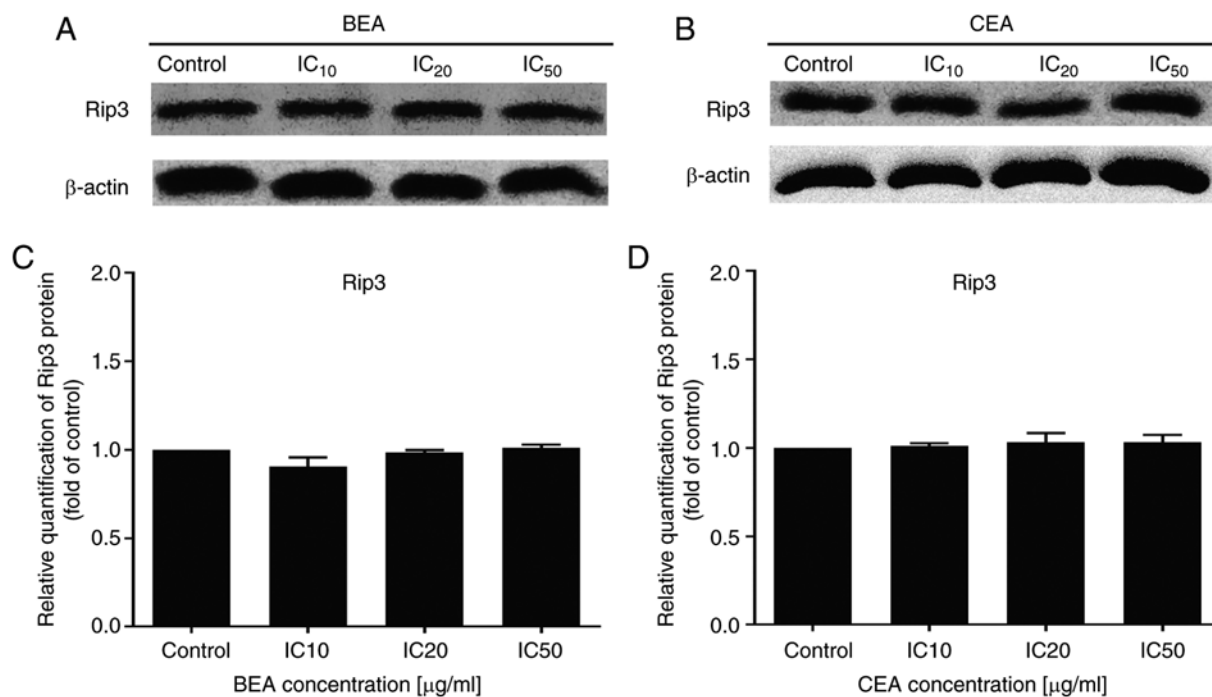

Supplement: Supplementary file 1 [file downloadSupplementary]
